# Supplementary material for: Trust in health information sources and its associations with COVID-19 disruptions to social relationships and health services among people living with HIV
Source: Springer Nature journal article supplement (doi:10.1186/s12889-021-10856-z), 2021-04-28
Supplement: MOESM1 [file 19114424]

## KISS Study Health Survey Pilot

 Codebook ▾

### Data Dictionary Codebook

10/29/2020 5:55pm

| #                                                      | Variable / Field Name | Field Label<br><i>Field Note</i>                | Field Attributes (Field Type, Validation,<br>Choices, Calculations, etc.)                                                                                  |   |                   |              |            |   |          |
|--------------------------------------------------------|-----------------------|-------------------------------------------------|------------------------------------------------------------------------------------------------------------------------------------------------------------|---|-------------------|--------------|------------|---|----------|
| Instrument: <b>Participants</b> (participants)         |                       |                                                 |                                                                                                                                                            |   |                   |              |            |   |          |
| 1                                                      | participant_id        | Participant ID                                  | text, Identifier                                                                                                                                           |   |                   |              |            |   |          |
| 2                                                      | phone                 | Phone                                           | text (phone), Identifier                                                                                                                                   |   |                   |              |            |   |          |
| 3                                                      | email                 | Email                                           | text (email)                                                                                                                                               |   |                   |              |            |   |          |
| 4                                                      | pcpt_gender           | Participant is...                               | radio, Required<br><table border="1"> <tr><td>1</td><td>Male</td></tr> <tr><td>2</td><td>Female</td></tr> </table>                                         | 1 | Male              | 2            | Female     |   |          |
| 1                                                      | Male                  |                                                 |                                                                                                                                                            |   |                   |              |            |   |          |
| 2                                                      | Female                |                                                 |                                                                                                                                                            |   |                   |              |            |   |          |
| 5                                                      | pcpt_hivstatus        | Participant HIV status                          | checkbox, Required<br><table border="1"> <tr><td>2</td><td>pcpt_hivstatus__2</td><td>HIV Positive</td></tr> </table>                                       | 2 | pcpt_hivstatus__2 | HIV Positive |            |   |          |
| 2                                                      | pcpt_hivstatus__2     | HIV Positive                                    |                                                                                                                                                            |   |                   |              |            |   |          |
| 6                                                      | send_srv1             | Send Survey 1?                                  | checkbox, Required<br><table border="1"> <tr><td>1</td><td>send_srv1__1</td><td>Yes</td></tr> </table>                                                     | 1 | send_srv1__1      | Yes          |            |   |          |
| 1                                                      | send_srv1__1          | Yes                                             |                                                                                                                                                            |   |                   |              |            |   |          |
| 7                                                      | participants_complete | Section Header: <i>Form Status</i><br>Complete? | dropdown<br><table border="1"> <tr><td>0</td><td>Incomplete</td></tr> <tr><td>1</td><td>Unverified</td></tr> <tr><td>2</td><td>Complete</td></tr> </table> | 0 | Incomplete        | 1            | Unverified | 2 | Complete |
| 0                                                      | Incomplete            |                                                 |                                                                                                                                                            |   |                   |              |            |   |          |
| 1                                                      | Unverified            |                                                 |                                                                                                                                                            |   |                   |              |            |   |          |
| 2                                                      | Complete              |                                                 |                                                                                                                                                            |   |                   |              |            |   |          |
| Instrument: <b>Information Page</b> (information_page) |                       |                                                 |                                                                                                                                                            |   |                   |              |            |   |          |
| 8                                                      | uconn_logo            |                                                 | descriptive                                                                                                                                                |   |                   |              |            |   |          |

|    |       |                                                                                                                                                                                                                                                                                                                                                                                                                                                                                                                                                                                                                                                                                                                                                                                                                                                                                                                                                                                                                                                                                                                         |             |
|----|-------|-------------------------------------------------------------------------------------------------------------------------------------------------------------------------------------------------------------------------------------------------------------------------------------------------------------------------------------------------------------------------------------------------------------------------------------------------------------------------------------------------------------------------------------------------------------------------------------------------------------------------------------------------------------------------------------------------------------------------------------------------------------------------------------------------------------------------------------------------------------------------------------------------------------------------------------------------------------------------------------------------------------------------------------------------------------------------------------------------------------------------|-------------|
| 9  | info1 | <p>Information Sheet for Participation in a Research Study</p> <p>UCONN IRB Approved 23-Aug-2019</p> <p>Principal Investigator: Seth Kalichman, PhD<br/> Title of Study: KISS Surveys<br/> Sponsor: National Institute of Mental Health</p>                                                                                                                                                                                                                                                                                                                                                                                                                                                                                                                                                                                                                                                                                                                                                                                                                                                                             | descriptive |
| 10 | info2 | <p>You are invited to participate in a research study. This form includes information about the study and contact information if you have any questions.</p> <p>The purpose of the KISS Survey is to develop new questionnaires to help us better understand the sexual health experiences of people living in the southeastern USA. You will be asked to complete two electronic surveys on your computer, phone or tablet. You will be asked to complete the surveys on your own, in the privacy of your own space. The surveys contain sensitive and personal questions about your health, personal social experiences, family and social relationships, sex life, use of alcohol and other substances.</p> <p>None of this information is stored on your electronic device and your name, or any other identifying information, will not be connected to your surveys. While we hope you will complete every question, but you do have the right to refuse to complete any particular question and you can stop your participation at any time before or during the surveys without any cost or penalty to you.</p> | descriptive |
| 11 | info3 | <p>Survey 1</p> <p>You will be sent a link for Survey 1 either via a text or email. It will take approximately 30-60 minutes to complete the survey. You will be paid \$25 via PayPal or an eGift Card within 24 hours (week days) of completion of the survey. You may select either method of payment.</p>                                                                                                                                                                                                                                                                                                                                                                                                                                                                                                                                                                                                                                                                                                                                                                                                            | descriptive |
| 12 | info4 | <p>Survey 2</p> <p>After you have completed Survey 1 and have been paid, you will receive a second link for Survey 2 via an email or text. It will take approximately 30-60 minutes to complete the survey. You will be paid \$35 via PayPal or an eGift within 24 hours (week days) of completion of the Survey 2. You may select either method of payment.</p>                                                                                                                                                                                                                                                                                                                                                                                                                                                                                                                                                                                                                                                                                                                                                        | descriptive |

|    |       |                                                                                                                                                                                                                                                                                                                                                                                                                                                                                                                                                                                                                                                                                                                                                                                                                                                                                                                                                            |             |
|----|-------|------------------------------------------------------------------------------------------------------------------------------------------------------------------------------------------------------------------------------------------------------------------------------------------------------------------------------------------------------------------------------------------------------------------------------------------------------------------------------------------------------------------------------------------------------------------------------------------------------------------------------------------------------------------------------------------------------------------------------------------------------------------------------------------------------------------------------------------------------------------------------------------------------------------------------------------------------------|-------------|
| 13 | info5 | <p>We ask that you complete each survey as you get them, in a single sitting, meaning that once you start a survey you finish it without leaving it for more than 15 minutes. If the survey is left idle for more than 15 minutes, the link will close and you will need to start from the beginning.</p> <p>This study should take less than 3-hours of your time to complete both surveys and all study procedures. Your participation will be anonymous, meaning your name or any other identifying information will not be collected as part or in conjunction with your survey responses.</p>                                                                                                                                                                                                                                                                                                                                                         | descriptive |
| 14 | info6 | <p>You will not be contacted again in the future, unless you expressly wish to know about future surveys and study opportunities. At enrollment, you will be asked to provide your email and phone number in order that you may receive the surveys and eGift cards. The list linking your email and gift card will not be linked to your data. Your email is not connected in any way to your survey responses.</p> <p>Some of the questions in the survey are sensitive in nature. As a result, you may become uncomfortable or upset when taking the survey. You can choose to skip any question that you do not want to answer. We ask that you complete the surveys by answering the questions honestly and accurately.</p> <p>There is no direct benefit to you from this research. However, the benefits of your participation may impact your community by helping to develop new health and well-being programs for people in your community.</p> | descriptive |

|     |                                                         |                                                                                                                                                                                      |                                                           |
|-----|---------------------------------------------------------|--------------------------------------------------------------------------------------------------------------------------------------------------------------------------------------|-----------------------------------------------------------|
| 652 | cov4_pm2<br>Show the field ONLY if:<br>[cov3_pm2]=1     | How much have heard about CoronaVirus/Covid-19?                                                                                                                                      | radio, Required<br>0 Not much<br>1 Some<br>2 A great deal |
| 653 | covknow1_pm2<br>Show the field ONLY if:<br>[cov3_pm2]=1 | Section Header: <i>Please answer whether you believe these statements about the new CoronaVirus, also called Covid-19, to be true or false.</i><br>Antibiotics can cure coronavirus. | radio, Required<br>3 True<br>2 False<br>1 Don't know      |
| 654 | covknow2_pm2<br>Show the field ONLY if:<br>[cov3_pm2]=1 | People of all ages can become infected with the coronavirus.                                                                                                                         | radio, Required<br>3 True<br>2 False<br>1 Don't know      |
| 655 | covknow3_pm2<br>Show the field ONLY if:<br>[cov3_pm2]=1 | Coronavirus has been around a long time and only recently came to the USA.                                                                                                           | radio, Required<br>3 True<br>2 False<br>1 Don't know      |
| 656 | covknow4_pm2<br>Show the field ONLY if:<br>[cov3_pm2]=1 | Eating garlic can lower your chances of getting infected with the coronavirus.                                                                                                       | radio, Required<br>3 True<br>2 False<br>1 Don't know      |
| 657 | covknow5_pm2<br>Show the field ONLY if:<br>[cov3_pm2]=1 | Coronavirus is no different than a bad case of the flu.                                                                                                                              | radio, Required<br>3 True<br>2 False<br>1 Don't know      |
| 658 | covknow6_pm2<br>Show the field ONLY if:<br>[cov3_pm2]=1 | Most people who are infected with the coronavirus recover from it.                                                                                                                   | radio, Required<br>3 True<br>2 False<br>1 Don't know      |
| 659 | covknow7_pm2<br>Show the field ONLY if:<br>[cov3_pm2]=1 | Antibiotics can be used to prevent infection from the coronavirus.                                                                                                                   | radio, Required<br>3 True<br>2 False<br>1 Don't know      |
| 660 | covknow8_pm2<br>Show the field ONLY if:<br>[cov3_pm2]=1 | The CoronaVirus can be cured with a drug used to treat Malaria.                                                                                                                      | radio, Required<br>3 True<br>2 False<br>1 Don't know      |

|     |                                                                               |                                                                                                             |                                                                                                                                                                                                                                                                               |   |                 |   |                 |    |                  |   |              |    |                  |   |   |   |             |
|-----|-------------------------------------------------------------------------------|-------------------------------------------------------------------------------------------------------------|-------------------------------------------------------------------------------------------------------------------------------------------------------------------------------------------------------------------------------------------------------------------------------|---|-----------------|---|-----------------|----|------------------|---|--------------|----|------------------|---|---|---|-------------|
| 661 | covknow9_pm2<br>Show the field ONLY if:<br>[cov3_pm2]=1                       | The CoronaVirus can be cured with drugs used to treat HIV.                                                  | radio, Required<br><table border="1"> <tr><td>3</td><td>True</td></tr> <tr><td>2</td><td>False</td></tr> <tr><td>1</td><td>Don't know</td></tr> </table>                                                                                                                      | 3 | True            | 2 | False           | 1  | Don't know       |   |              |    |                  |   |   |   |             |
| 3   | True                                                                          |                                                                                                             |                                                                                                                                                                                                                                                                               |   |                 |   |                 |    |                  |   |              |    |                  |   |   |   |             |
| 2   | False                                                                         |                                                                                                             |                                                                                                                                                                                                                                                                               |   |                 |   |                 |    |                  |   |              |    |                  |   |   |   |             |
| 1   | Don't know                                                                    |                                                                                                             |                                                                                                                                                                                                                                                                               |   |                 |   |                 |    |                  |   |              |    |                  |   |   |   |             |
| 662 | cov5_pm2<br>Show the field ONLY if:<br>[cov3_pm2]=1                           | Section Header:<br>Do you believe that you have had the CoronaVirus?                                        | radio, Required<br><table border="1"> <tr><td>1</td><td>Yes</td></tr> <tr><td>0</td><td>No</td></tr> </table>                                                                                                                                                                 | 1 | Yes             | 0 | No              |    |                  |   |              |    |                  |   |   |   |             |
| 1   | Yes                                                                           |                                                                                                             |                                                                                                                                                                                                                                                                               |   |                 |   |                 |    |                  |   |              |    |                  |   |   |   |             |
| 0   | No                                                                            |                                                                                                             |                                                                                                                                                                                                                                                                               |   |                 |   |                 |    |                  |   |              |    |                  |   |   |   |             |
| 663 | cov6_pm2<br>Show the field ONLY if:<br>[cov3_pm2]=1                           | Have you received a test for CoronaVirus/Covid-19?                                                          | radio, Required<br><table border="1"> <tr><td>1</td><td>Yes</td></tr> <tr><td>0</td><td>No</td></tr> </table>                                                                                                                                                                 | 1 | Yes             | 0 | No              |    |                  |   |              |    |                  |   |   |   |             |
| 1   | Yes                                                                           |                                                                                                             |                                                                                                                                                                                                                                                                               |   |                 |   |                 |    |                  |   |              |    |                  |   |   |   |             |
| 0   | No                                                                            |                                                                                                             |                                                                                                                                                                                                                                                                               |   |                 |   |                 |    |                  |   |              |    |                  |   |   |   |             |
| 664 | cov6a_pm2<br>Show the field ONLY if:<br>[cov3_pm2]=1 and [cov6_pm2]=1         | Section Header:<br>What was the result of your CoronaVirus/Covid-19 test?                                   | radio, Required<br><table border="1"> <tr><td>1</td><td>Positive</td></tr> <tr><td>0</td><td>Negative</td></tr> <tr><td>2</td><td>Don't know</td></tr> </table>                                                                                                               | 1 | Positive        | 0 | Negative        | 2  | Don't know       |   |              |    |                  |   |   |   |             |
| 1   | Positive                                                                      |                                                                                                             |                                                                                                                                                                                                                                                                               |   |                 |   |                 |    |                  |   |              |    |                  |   |   |   |             |
| 0   | Negative                                                                      |                                                                                                             |                                                                                                                                                                                                                                                                               |   |                 |   |                 |    |                  |   |              |    |                  |   |   |   |             |
| 2   | Don't know                                                                    |                                                                                                             |                                                                                                                                                                                                                                                                               |   |                 |   |                 |    |                  |   |              |    |                  |   |   |   |             |
| 665 | cov_enacted1_pm2<br>Show the field ONLY if:<br>[cov6_pm2]=1 and [cov6a_pm2]=1 | Section Header:<br>In general, how open would you say you are about having tested positive for CoronaVirus? | radio, Required<br><table border="1"> <tr><td>1</td><td>Not at all open</td></tr> <tr><td>2</td><td>Mostly not open</td></tr> <tr><td>3</td><td>Mostly open</td></tr> <tr><td>4</td><td>Totally open</td></tr> <tr><td>10</td><td>Refuse to answer</td></tr> </table>         | 1 | Not at all open | 2 | Mostly not open | 3  | Mostly open      | 4 | Totally open | 10 | Refuse to answer |   |   |   |             |
| 1   | Not at all open                                                               |                                                                                                             |                                                                                                                                                                                                                                                                               |   |                 |   |                 |    |                  |   |              |    |                  |   |   |   |             |
| 2   | Mostly not open                                                               |                                                                                                             |                                                                                                                                                                                                                                                                               |   |                 |   |                 |    |                  |   |              |    |                  |   |   |   |             |
| 3   | Mostly open                                                                   |                                                                                                             |                                                                                                                                                                                                                                                                               |   |                 |   |                 |    |                  |   |              |    |                  |   |   |   |             |
| 4   | Totally open                                                                  |                                                                                                             |                                                                                                                                                                                                                                                                               |   |                 |   |                 |    |                  |   |              |    |                  |   |   |   |             |
| 10  | Refuse to answer                                                              |                                                                                                             |                                                                                                                                                                                                                                                                               |   |                 |   |                 |    |                  |   |              |    |                  |   |   |   |             |
| 666 | cov_enacted2_pm2<br>Show the field ONLY if:<br>[cov6_pm2]=1 and [cov6a_pm2]=1 | How many people did you tell that you tested positive for CoronaVirus?                                      | dropdown, Required<br><table border="1"> <tr><td>0</td><td>0</td></tr> <tr><td>1</td><td>1</td></tr> <tr><td>2</td><td>2</td></tr> <tr><td>3</td><td>3</td></tr> <tr><td>4</td><td>4</td></tr> <tr><td>5</td><td>5</td></tr> <tr><td>6</td><td>more than 5</td></tr> </table> | 0 | 0               | 1 | 1               | 2  | 2                | 3 | 3            | 4  | 4                | 5 | 5 | 6 | more than 5 |
| 0   | 0                                                                             |                                                                                                             |                                                                                                                                                                                                                                                                               |   |                 |   |                 |    |                  |   |              |    |                  |   |   |   |             |
| 1   | 1                                                                             |                                                                                                             |                                                                                                                                                                                                                                                                               |   |                 |   |                 |    |                  |   |              |    |                  |   |   |   |             |
| 2   | 2                                                                             |                                                                                                             |                                                                                                                                                                                                                                                                               |   |                 |   |                 |    |                  |   |              |    |                  |   |   |   |             |
| 3   | 3                                                                             |                                                                                                             |                                                                                                                                                                                                                                                                               |   |                 |   |                 |    |                  |   |              |    |                  |   |   |   |             |
| 4   | 4                                                                             |                                                                                                             |                                                                                                                                                                                                                                                                               |   |                 |   |                 |    |                  |   |              |    |                  |   |   |   |             |
| 5   | 5                                                                             |                                                                                                             |                                                                                                                                                                                                                                                                               |   |                 |   |                 |    |                  |   |              |    |                  |   |   |   |             |
| 6   | more than 5                                                                   |                                                                                                             |                                                                                                                                                                                                                                                                               |   |                 |   |                 |    |                  |   |              |    |                  |   |   |   |             |
| 667 | cov_enacted3_pm2<br>Show the field ONLY if:<br>[cov6_pm2]=1 and [cov6a_pm2]=1 | Did you tell people you were sick with something different, so they would not know you had CoronaVirus?     | radio, Required<br><table border="1"> <tr><td>1</td><td>Yes</td></tr> <tr><td>0</td><td>No</td></tr> <tr><td>10</td><td>Refuse to answer</td></tr> </table>                                                                                                                   | 1 | Yes             | 0 | No              | 10 | Refuse to answer |   |              |    |                  |   |   |   |             |
| 1   | Yes                                                                           |                                                                                                             |                                                                                                                                                                                                                                                                               |   |                 |   |                 |    |                  |   |              |    |                  |   |   |   |             |
| 0   | No                                                                            |                                                                                                             |                                                                                                                                                                                                                                                                               |   |                 |   |                 |    |                  |   |              |    |                  |   |   |   |             |
| 10  | Refuse to answer                                                              |                                                                                                             |                                                                                                                                                                                                                                                                               |   |                 |   |                 |    |                  |   |              |    |                  |   |   |   |             |

|     |                                                                                                                                               |                                                                                                                                                                                          |                                                                                                                                                                                                                                                                                                                                                                                                   |   |                |   |                |   |                |   |                   |   |                   |   |                   |   |                                         |
|-----|-----------------------------------------------------------------------------------------------------------------------------------------------|------------------------------------------------------------------------------------------------------------------------------------------------------------------------------------------|---------------------------------------------------------------------------------------------------------------------------------------------------------------------------------------------------------------------------------------------------------------------------------------------------------------------------------------------------------------------------------------------------|---|----------------|---|----------------|---|----------------|---|-------------------|---|-------------------|---|-------------------|---|-----------------------------------------|
| 668 | <p>cov_enacted4_pm2</p> <p>Show the field ONLY if:<br/>[cov6_pm2]=1 and [cov6a_pm2]=1</p>                                                     | <p>People treated me different when I told them I tested positive for CoronaVirus.</p>                                                                                                   | <p>radio, Required</p> <table border="1"> <tr><td>5</td><td>Strongly Agree</td></tr> <tr><td>4</td><td>Somewhat Agree</td></tr> <tr><td>3</td><td>Slightly Agree</td></tr> <tr><td>2</td><td>Slightly Disagree</td></tr> <tr><td>1</td><td>Somewhat Disagree</td></tr> <tr><td>0</td><td>Strongly Disagree</td></tr> <tr><td>9</td><td>I did not tell anyone I tested positive</td></tr> </table> | 5 | Strongly Agree | 4 | Somewhat Agree | 3 | Slightly Agree | 2 | Slightly Disagree | 1 | Somewhat Disagree | 0 | Strongly Disagree | 9 | I did not tell anyone I tested positive |
| 5   | Strongly Agree                                                                                                                                |                                                                                                                                                                                          |                                                                                                                                                                                                                                                                                                                                                                                                   |   |                |   |                |   |                |   |                   |   |                   |   |                   |   |                                         |
| 4   | Somewhat Agree                                                                                                                                |                                                                                                                                                                                          |                                                                                                                                                                                                                                                                                                                                                                                                   |   |                |   |                |   |                |   |                   |   |                   |   |                   |   |                                         |
| 3   | Slightly Agree                                                                                                                                |                                                                                                                                                                                          |                                                                                                                                                                                                                                                                                                                                                                                                   |   |                |   |                |   |                |   |                   |   |                   |   |                   |   |                                         |
| 2   | Slightly Disagree                                                                                                                             |                                                                                                                                                                                          |                                                                                                                                                                                                                                                                                                                                                                                                   |   |                |   |                |   |                |   |                   |   |                   |   |                   |   |                                         |
| 1   | Somewhat Disagree                                                                                                                             |                                                                                                                                                                                          |                                                                                                                                                                                                                                                                                                                                                                                                   |   |                |   |                |   |                |   |                   |   |                   |   |                   |   |                                         |
| 0   | Strongly Disagree                                                                                                                             |                                                                                                                                                                                          |                                                                                                                                                                                                                                                                                                                                                                                                   |   |                |   |                |   |                |   |                   |   |                   |   |                   |   |                                         |
| 9   | I did not tell anyone I tested positive                                                                                                       |                                                                                                                                                                                          |                                                                                                                                                                                                                                                                                                                                                                                                   |   |                |   |                |   |                |   |                   |   |                   |   |                   |   |                                         |
| 669 | <p>cov_enacted5_pm2</p> <p>Show the field ONLY if:<br/>[cov6_pm2]=1 and [cov6a_pm2]=1</p>                                                     | <p>People were supportive when I told them I tested positive for CoronaVirus.</p>                                                                                                        | <p>radio, Required</p> <table border="1"> <tr><td>5</td><td>Strongly Agree</td></tr> <tr><td>4</td><td>Somewhat Agree</td></tr> <tr><td>3</td><td>Slightly Agree</td></tr> <tr><td>2</td><td>Slightly Disagree</td></tr> <tr><td>1</td><td>Somewhat Disagree</td></tr> <tr><td>0</td><td>Strongly Disagree</td></tr> <tr><td>9</td><td>I did not tell anyone I tested positive</td></tr> </table> | 5 | Strongly Agree | 4 | Somewhat Agree | 3 | Slightly Agree | 2 | Slightly Disagree | 1 | Somewhat Disagree | 0 | Strongly Disagree | 9 | I did not tell anyone I tested positive |
| 5   | Strongly Agree                                                                                                                                |                                                                                                                                                                                          |                                                                                                                                                                                                                                                                                                                                                                                                   |   |                |   |                |   |                |   |                   |   |                   |   |                   |   |                                         |
| 4   | Somewhat Agree                                                                                                                                |                                                                                                                                                                                          |                                                                                                                                                                                                                                                                                                                                                                                                   |   |                |   |                |   |                |   |                   |   |                   |   |                   |   |                                         |
| 3   | Slightly Agree                                                                                                                                |                                                                                                                                                                                          |                                                                                                                                                                                                                                                                                                                                                                                                   |   |                |   |                |   |                |   |                   |   |                   |   |                   |   |                                         |
| 2   | Slightly Disagree                                                                                                                             |                                                                                                                                                                                          |                                                                                                                                                                                                                                                                                                                                                                                                   |   |                |   |                |   |                |   |                   |   |                   |   |                   |   |                                         |
| 1   | Somewhat Disagree                                                                                                                             |                                                                                                                                                                                          |                                                                                                                                                                                                                                                                                                                                                                                                   |   |                |   |                |   |                |   |                   |   |                   |   |                   |   |                                         |
| 0   | Strongly Disagree                                                                                                                             |                                                                                                                                                                                          |                                                                                                                                                                                                                                                                                                                                                                                                   |   |                |   |                |   |                |   |                   |   |                   |   |                   |   |                                         |
| 9   | I did not tell anyone I tested positive                                                                                                       |                                                                                                                                                                                          |                                                                                                                                                                                                                                                                                                                                                                                                   |   |                |   |                |   |                |   |                   |   |                   |   |                   |   |                                         |
| 670 | <p>cov_enacted6_pm2</p> <p>Show the field ONLY if:<br/>[cov6_pm2]=1 and [cov6a_pm2]=1</p>                                                     | <p>People acted fearful when I told them I tested positive for CoronaVirus.</p>                                                                                                          | <p>radio, Required</p> <table border="1"> <tr><td>5</td><td>Strongly Agree</td></tr> <tr><td>4</td><td>Somewhat Agree</td></tr> <tr><td>3</td><td>Slightly Agree</td></tr> <tr><td>2</td><td>Slightly Disagree</td></tr> <tr><td>1</td><td>Somewhat Disagree</td></tr> <tr><td>0</td><td>Strongly Disagree</td></tr> <tr><td>9</td><td>I did not tell anyone I tested positive</td></tr> </table> | 5 | Strongly Agree | 4 | Somewhat Agree | 3 | Slightly Agree | 2 | Slightly Disagree | 1 | Somewhat Disagree | 0 | Strongly Disagree | 9 | I did not tell anyone I tested positive |
| 5   | Strongly Agree                                                                                                                                |                                                                                                                                                                                          |                                                                                                                                                                                                                                                                                                                                                                                                   |   |                |   |                |   |                |   |                   |   |                   |   |                   |   |                                         |
| 4   | Somewhat Agree                                                                                                                                |                                                                                                                                                                                          |                                                                                                                                                                                                                                                                                                                                                                                                   |   |                |   |                |   |                |   |                   |   |                   |   |                   |   |                                         |
| 3   | Slightly Agree                                                                                                                                |                                                                                                                                                                                          |                                                                                                                                                                                                                                                                                                                                                                                                   |   |                |   |                |   |                |   |                   |   |                   |   |                   |   |                                         |
| 2   | Slightly Disagree                                                                                                                             |                                                                                                                                                                                          |                                                                                                                                                                                                                                                                                                                                                                                                   |   |                |   |                |   |                |   |                   |   |                   |   |                   |   |                                         |
| 1   | Somewhat Disagree                                                                                                                             |                                                                                                                                                                                          |                                                                                                                                                                                                                                                                                                                                                                                                   |   |                |   |                |   |                |   |                   |   |                   |   |                   |   |                                         |
| 0   | Strongly Disagree                                                                                                                             |                                                                                                                                                                                          |                                                                                                                                                                                                                                                                                                                                                                                                   |   |                |   |                |   |                |   |                   |   |                   |   |                   |   |                                         |
| 9   | I did not tell anyone I tested positive                                                                                                       |                                                                                                                                                                                          |                                                                                                                                                                                                                                                                                                                                                                                                   |   |                |   |                |   |                |   |                   |   |                   |   |                   |   |                                         |
| 671 | <p>time4_pm2</p>                                                                                                                              | <p>Section Header: <i>Imagine that you did test positive for CoronaVirus. The next questions ask what you think you would do if you tested positive for CoronaVirus.</i></p> <p>time</p> | <p>text (datetime_seconds_mdy)</p> <p>Field Annotation: @NOW @HIDDEN-SURVEY</p>                                                                                                                                                                                                                                                                                                                   |   |                |   |                |   |                |   |                   |   |                   |   |                   |   |                                         |
| 672 | <p>cov_antic1_pm2</p> <p>Show the field ONLY if:<br/>[cov3_pm2]=1 and ([cov6_pm2]=0 or [cov6_pm2]=1) and ([cov6a_pm2]=0 or [cov6a_pm2]=2)</p> | <p>How many people do you think you would tell if you tested positive for CoronaVirus?</p>                                                                                               | <p>dropdown, Required</p> <table border="1"> <tr><td>0</td><td>0</td></tr> <tr><td>1</td><td>1</td></tr> <tr><td>2</td><td>2</td></tr> <tr><td>3</td><td>3</td></tr> <tr><td>4</td><td>4</td></tr> <tr><td>5</td><td>5</td></tr> <tr><td>6</td><td>more than 5</td></tr> </table>                                                                                                                 | 0 | 0              | 1 | 1              | 2 | 2              | 3 | 3                 | 4 | 4                 | 5 | 5                 | 6 | more than 5                             |
| 0   | 0                                                                                                                                             |                                                                                                                                                                                          |                                                                                                                                                                                                                                                                                                                                                                                                   |   |                |   |                |   |                |   |                   |   |                   |   |                   |   |                                         |
| 1   | 1                                                                                                                                             |                                                                                                                                                                                          |                                                                                                                                                                                                                                                                                                                                                                                                   |   |                |   |                |   |                |   |                   |   |                   |   |                   |   |                                         |
| 2   | 2                                                                                                                                             |                                                                                                                                                                                          |                                                                                                                                                                                                                                                                                                                                                                                                   |   |                |   |                |   |                |   |                   |   |                   |   |                   |   |                                         |
| 3   | 3                                                                                                                                             |                                                                                                                                                                                          |                                                                                                                                                                                                                                                                                                                                                                                                   |   |                |   |                |   |                |   |                   |   |                   |   |                   |   |                                         |
| 4   | 4                                                                                                                                             |                                                                                                                                                                                          |                                                                                                                                                                                                                                                                                                                                                                                                   |   |                |   |                |   |                |   |                   |   |                   |   |                   |   |                                         |
| 5   | 5                                                                                                                                             |                                                                                                                                                                                          |                                                                                                                                                                                                                                                                                                                                                                                                   |   |                |   |                |   |                |   |                   |   |                   |   |                   |   |                                         |
| 6   | more than 5                                                                                                                                   |                                                                                                                                                                                          |                                                                                                                                                                                                                                                                                                                                                                                                   |   |                |   |                |   |                |   |                   |   |                   |   |                   |   |                                         |

|     |                                                                                                                                   |                                                                                                                                                                                                             |                                                                                                                                                                                                                                                                                                                           |   |                |   |                |    |                  |   |                   |   |                   |   |                   |
|-----|-----------------------------------------------------------------------------------------------------------------------------------|-------------------------------------------------------------------------------------------------------------------------------------------------------------------------------------------------------------|---------------------------------------------------------------------------------------------------------------------------------------------------------------------------------------------------------------------------------------------------------------------------------------------------------------------------|---|----------------|---|----------------|----|------------------|---|-------------------|---|-------------------|---|-------------------|
| 673 | cov_antic2_pm2<br>Show the field ONLY if:<br>[cov3_pm2]=1 and ([cov6_pm2]=0 or [cov6_pm2]=1) and ([cov6a_pm2]=0 or [cov6a_pm2]=2) | Would you tell people you were sick with something different, so they would not know you had CoronaVirus?                                                                                                   | radio, Required<br><table border="1"> <tr><td>1</td><td>Yes</td></tr> <tr><td>0</td><td>No</td></tr> <tr><td>10</td><td>Refuse to answer</td></tr> </table>                                                                                                                                                               | 1 | Yes            | 0 | No             | 10 | Refuse to answer |   |                   |   |                   |   |                   |
| 1   | Yes                                                                                                                               |                                                                                                                                                                                                             |                                                                                                                                                                                                                                                                                                                           |   |                |   |                |    |                  |   |                   |   |                   |   |                   |
| 0   | No                                                                                                                                |                                                                                                                                                                                                             |                                                                                                                                                                                                                                                                                                                           |   |                |   |                |    |                  |   |                   |   |                   |   |                   |
| 10  | Refuse to answer                                                                                                                  |                                                                                                                                                                                                             |                                                                                                                                                                                                                                                                                                                           |   |                |   |                |    |                  |   |                   |   |                   |   |                   |
| 674 | cov_antic3_pm2<br>Show the field ONLY if:<br>[cov3_pm2]=1 and ([cov6_pm2]=0 or [cov6_pm2]=1) and ([cov6a_pm2]=0 or [cov6a_pm2]=2) | People would treat me different if I told them I tested positive for CoronaVirus.                                                                                                                           | radio, Required<br><table border="1"> <tr><td>5</td><td>Strongly Agree</td></tr> <tr><td>4</td><td>Somewhat Agree</td></tr> <tr><td>3</td><td>Slightly Agree</td></tr> <tr><td>2</td><td>Slightly Disagree</td></tr> <tr><td>1</td><td>Somewhat Disagree</td></tr> <tr><td>0</td><td>Strongly Disagree</td></tr> </table> | 5 | Strongly Agree | 4 | Somewhat Agree | 3  | Slightly Agree   | 2 | Slightly Disagree | 1 | Somewhat Disagree | 0 | Strongly Disagree |
| 5   | Strongly Agree                                                                                                                    |                                                                                                                                                                                                             |                                                                                                                                                                                                                                                                                                                           |   |                |   |                |    |                  |   |                   |   |                   |   |                   |
| 4   | Somewhat Agree                                                                                                                    |                                                                                                                                                                                                             |                                                                                                                                                                                                                                                                                                                           |   |                |   |                |    |                  |   |                   |   |                   |   |                   |
| 3   | Slightly Agree                                                                                                                    |                                                                                                                                                                                                             |                                                                                                                                                                                                                                                                                                                           |   |                |   |                |    |                  |   |                   |   |                   |   |                   |
| 2   | Slightly Disagree                                                                                                                 |                                                                                                                                                                                                             |                                                                                                                                                                                                                                                                                                                           |   |                |   |                |    |                  |   |                   |   |                   |   |                   |
| 1   | Somewhat Disagree                                                                                                                 |                                                                                                                                                                                                             |                                                                                                                                                                                                                                                                                                                           |   |                |   |                |    |                  |   |                   |   |                   |   |                   |
| 0   | Strongly Disagree                                                                                                                 |                                                                                                                                                                                                             |                                                                                                                                                                                                                                                                                                                           |   |                |   |                |    |                  |   |                   |   |                   |   |                   |
| 675 | cov_antic4_pm2<br>Show the field ONLY if:<br>[cov3_pm2]=1 and ([cov6_pm2]=0 or [cov6_pm2]=1) and ([cov6a_pm2]=0 or [cov6a_pm2]=2) | People would be supportive if I told them I tested positive for CoronaVirus.                                                                                                                                | radio, Required<br><table border="1"> <tr><td>5</td><td>Strongly Agree</td></tr> <tr><td>4</td><td>Somewhat Agree</td></tr> <tr><td>3</td><td>Slightly Agree</td></tr> <tr><td>2</td><td>Slightly Disagree</td></tr> <tr><td>1</td><td>Somewhat Disagree</td></tr> <tr><td>0</td><td>Strongly Disagree</td></tr> </table> | 5 | Strongly Agree | 4 | Somewhat Agree | 3  | Slightly Agree   | 2 | Slightly Disagree | 1 | Somewhat Disagree | 0 | Strongly Disagree |
| 5   | Strongly Agree                                                                                                                    |                                                                                                                                                                                                             |                                                                                                                                                                                                                                                                                                                           |   |                |   |                |    |                  |   |                   |   |                   |   |                   |
| 4   | Somewhat Agree                                                                                                                    |                                                                                                                                                                                                             |                                                                                                                                                                                                                                                                                                                           |   |                |   |                |    |                  |   |                   |   |                   |   |                   |
| 3   | Slightly Agree                                                                                                                    |                                                                                                                                                                                                             |                                                                                                                                                                                                                                                                                                                           |   |                |   |                |    |                  |   |                   |   |                   |   |                   |
| 2   | Slightly Disagree                                                                                                                 |                                                                                                                                                                                                             |                                                                                                                                                                                                                                                                                                                           |   |                |   |                |    |                  |   |                   |   |                   |   |                   |
| 1   | Somewhat Disagree                                                                                                                 |                                                                                                                                                                                                             |                                                                                                                                                                                                                                                                                                                           |   |                |   |                |    |                  |   |                   |   |                   |   |                   |
| 0   | Strongly Disagree                                                                                                                 |                                                                                                                                                                                                             |                                                                                                                                                                                                                                                                                                                           |   |                |   |                |    |                  |   |                   |   |                   |   |                   |
| 676 | cov_antic5_pm2<br>Show the field ONLY if:<br>[cov3_pm2]=1 and ([cov6_pm2]=0 or [cov6_pm2]=1) and ([cov6a_pm2]=0 or [cov6a_pm2]=2) | People would act fearful if I told them I tested positive for CoronaVirus.                                                                                                                                  | radio, Required<br><table border="1"> <tr><td>5</td><td>Strongly Agree</td></tr> <tr><td>4</td><td>Somewhat Agree</td></tr> <tr><td>3</td><td>Slightly Agree</td></tr> <tr><td>2</td><td>Slightly Disagree</td></tr> <tr><td>1</td><td>Somewhat Disagree</td></tr> <tr><td>0</td><td>Strongly Disagree</td></tr> </table> | 5 | Strongly Agree | 4 | Somewhat Agree | 3  | Slightly Agree   | 2 | Slightly Disagree | 1 | Somewhat Disagree | 0 | Strongly Disagree |
| 5   | Strongly Agree                                                                                                                    |                                                                                                                                                                                                             |                                                                                                                                                                                                                                                                                                                           |   |                |   |                |    |                  |   |                   |   |                   |   |                   |
| 4   | Somewhat Agree                                                                                                                    |                                                                                                                                                                                                             |                                                                                                                                                                                                                                                                                                                           |   |                |   |                |    |                  |   |                   |   |                   |   |                   |
| 3   | Slightly Agree                                                                                                                    |                                                                                                                                                                                                             |                                                                                                                                                                                                                                                                                                                           |   |                |   |                |    |                  |   |                   |   |                   |   |                   |
| 2   | Slightly Disagree                                                                                                                 |                                                                                                                                                                                                             |                                                                                                                                                                                                                                                                                                                           |   |                |   |                |    |                  |   |                   |   |                   |   |                   |
| 1   | Somewhat Disagree                                                                                                                 |                                                                                                                                                                                                             |                                                                                                                                                                                                                                                                                                                           |   |                |   |                |    |                  |   |                   |   |                   |   |                   |
| 0   | Strongly Disagree                                                                                                                 |                                                                                                                                                                                                             |                                                                                                                                                                                                                                                                                                                           |   |                |   |                |    |                  |   |                   |   |                   |   |                   |
| 677 | cov7_pm2<br>Show the field ONLY if:<br>[cov3_pm2]=1                                                                               | Section Header:<br>From 0 to 100, how concerned are you about catching the new CoronaVirus?                                                                                                                 | slider, Required<br>Slider labels: Not at all concerned, , Extremely Concerned<br>Custom alignment: RH                                                                                                                                                                                                                    |   |                |   |                |    |                  |   |                   |   |                   |   |                   |
| 678 | cov8_pm2<br>Show the field ONLY if:<br>[cov3_pm2]=1                                                                               | From 0 to 100, how concerned are you about someone you know catching the new CoronaVirus?                                                                                                                   | slider, Required<br>Slider labels: Not at all concerned, , Extremely Concerned<br>Custom alignment: RH                                                                                                                                                                                                                    |   |                |   |                |    |                  |   |                   |   |                   |   |                   |
| 679 | cov9_pm2<br>Show the field ONLY if:<br>[cov3_pm2]=1                                                                               | Section Header: <i>The new CoronaVirus is impacting people in different ways. Have you had any of the following experiences in response to CoronaVirus?</i><br>Staying indoors and away from public places. | radio, Required<br><table border="1"> <tr><td>2</td><td>Yes, a lot</td></tr> <tr><td>1</td><td>Yes a little</td></tr> <tr><td>0</td><td>No</td></tr> </table>                                                                                                                                                             | 2 | Yes, a lot     | 1 | Yes a little   | 0  | No               |   |                   |   |                   |   |                   |
| 2   | Yes, a lot                                                                                                                        |                                                                                                                                                                                                             |                                                                                                                                                                                                                                                                                                                           |   |                |   |                |    |                  |   |                   |   |                   |   |                   |
| 1   | Yes a little                                                                                                                      |                                                                                                                                                                                                             |                                                                                                                                                                                                                                                                                                                           |   |                |   |                |    |                  |   |                   |   |                   |   |                   |
| 0   | No                                                                                                                                |                                                                                                                                                                                                             |                                                                                                                                                                                                                                                                                                                           |   |                |   |                |    |                  |   |                   |   |                   |   |                   |

|     |                                                      |                                                                                                     |                                                           |
|-----|------------------------------------------------------|-----------------------------------------------------------------------------------------------------|-----------------------------------------------------------|
| 680 | cov10_pm2<br>Show the field ONLY if:<br>[cov3_pm2]=1 | Canceled plans that involve other people.                                                           | radio, Required<br>2 Yes, a lot<br>1 Yes a little<br>0 No |
| 681 | cov11_pm2<br>Show the field ONLY if:<br>[cov3_pm2]=1 | Been unable to get the food you need.                                                               | radio, Required<br>2 Yes, a lot<br>1 Yes a little<br>0 No |
| 682 | cov12_pm2<br>Show the field ONLY if:<br>[cov3_pm2]=1 | Been unable to get to a pharmacy because of the new CoronaVirus.                                    | radio, Required<br>2 Yes, a lot<br>1 Yes a little<br>0 No |
| 683 | cov13_pm2<br>Show the field ONLY if:<br>[cov3_pm2]=1 | Been unable to get to medicine you need because of the new virus.                                   | radio, Required<br>2 Yes, a lot<br>1 Yes a little<br>0 No |
| 684 | cov14_pm2<br>Show the field ONLY if:<br>[cov3_pm2]=1 | You cancelled a clinic or doctor.                                                                   | radio, Required<br>1 Yes<br>0 No                          |
| 685 | cov15_pm2<br>Show the field ONLY if:<br>[cov3_pm2]=1 | A clinic or doctor closed or cancelled your appointment because of the new CoronaVirus?             | radio, Required<br>1 Yes<br>0 No                          |
| 686 | cov16_pm2<br>Show the field ONLY if:<br>[cov3_pm2]=1 | A service provider of any type closed or cancelled your appointment because of the new CoronaVirus? | radio, Required<br>1 Yes<br>0 No                          |
| 687 | cov17_pm2<br>Show the field ONLY if:<br>[cov3_pm2]=1 | You asked others to stay away to avoid getting the new Coronavirus.                                 | radio, Required<br>2 Yes, a lot<br>1 Yes a little<br>0 No |
| 688 | cov18_pm2<br>Show the field ONLY if:<br>[cov3_pm2]=1 | You have been asked by others to stay away to protect you from getting the virus.                   | radio, Required<br>2 Yes, a lot<br>1 Yes a little<br>0 No |
| 689 | cov19_pm2<br>Show the field ONLY if:<br>[cov3_pm2]=1 | Was told not to come to work or school because of the CoronaVirus.                                  | radio, Required<br>2 Yes, a lot<br>1 Yes a little<br>0 No |



|     |                                                      |                                                                                                                                                                                                                                                                                              |                                                                                                                                                                                                                                                                                                                                                                         |   |                     |   |                |   |                |   |                   |   |                   |   |                   |    |                  |
|-----|------------------------------------------------------|----------------------------------------------------------------------------------------------------------------------------------------------------------------------------------------------------------------------------------------------------------------------------------------------|-------------------------------------------------------------------------------------------------------------------------------------------------------------------------------------------------------------------------------------------------------------------------------------------------------------------------------------------------------------------------|---|---------------------|---|----------------|---|----------------|---|-------------------|---|-------------------|---|-------------------|----|------------------|
| 690 | cov20_pm2<br>Show the field ONLY if:<br>[cov3_pm2]=1 | Avoided the MARTA/Public Transportation because of the CoronaVirus.                                                                                                                                                                                                                          | radio, Required<br><table border="1"> <tr><td>2</td><td>Yes, a lot</td></tr> <tr><td>1</td><td>Yes a little</td></tr> <tr><td>0</td><td>No</td></tr> </table>                                                                                                                                                                                                           | 2 | Yes, a lot          | 1 | Yes a little   | 0 | No             |   |                   |   |                   |   |                   |    |                  |
| 2   | Yes, a lot                                           |                                                                                                                                                                                                                                                                                              |                                                                                                                                                                                                                                                                                                                                                                         |   |                     |   |                |   |                |   |                   |   |                   |   |                   |    |                  |
| 1   | Yes a little                                         |                                                                                                                                                                                                                                                                                              |                                                                                                                                                                                                                                                                                                                                                                         |   |                     |   |                |   |                |   |                   |   |                   |   |                   |    |                  |
| 0   | No                                                   |                                                                                                                                                                                                                                                                                              |                                                                                                                                                                                                                                                                                                                                                                         |   |                     |   |                |   |                |   |                   |   |                   |   |                   |    |                  |
| 691 | cov21_pm2<br>Show the field ONLY if:<br>[cov3_pm2]=1 | Section Header: <i>The Government has taken some actions to prevent the spread of the new CoronaVirus. We are interested in your opinion. There are no right or wrong answers</i><br>How much do you trust that the Government is doing all it can to prevent the spread of the CoronaVirus? | radio, Required<br><table border="1"> <tr><td>4</td><td>Do not Trust at all</td></tr> <tr><td>3</td><td>Slightly Trust</td></tr> <tr><td>2</td><td>Somewhat Trust</td></tr> <tr><td>1</td><td>Trust Completely</td></tr> </table>                                                                                                                                       | 4 | Do not Trust at all | 3 | Slightly Trust | 2 | Somewhat Trust | 1 | Trust Completely  |   |                   |   |                   |    |                  |
| 4   | Do not Trust at all                                  |                                                                                                                                                                                                                                                                                              |                                                                                                                                                                                                                                                                                                                                                                         |   |                     |   |                |   |                |   |                   |   |                   |   |                   |    |                  |
| 3   | Slightly Trust                                       |                                                                                                                                                                                                                                                                                              |                                                                                                                                                                                                                                                                                                                                                                         |   |                     |   |                |   |                |   |                   |   |                   |   |                   |    |                  |
| 2   | Somewhat Trust                                       |                                                                                                                                                                                                                                                                                              |                                                                                                                                                                                                                                                                                                                                                                         |   |                     |   |                |   |                |   |                   |   |                   |   |                   |    |                  |
| 1   | Trust Completely                                     |                                                                                                                                                                                                                                                                                              |                                                                                                                                                                                                                                                                                                                                                                         |   |                     |   |                |   |                |   |                   |   |                   |   |                   |    |                  |
| 692 | cov22_pm2<br>Show the field ONLY if:<br>[cov3_pm2]=1 | How much do you trust information from the CDC about the new CoronaVirus?                                                                                                                                                                                                                    | radio, Required<br><table border="1"> <tr><td>4</td><td>Do not Trust at all</td></tr> <tr><td>3</td><td>Slightly Trust</td></tr> <tr><td>2</td><td>Somewhat Trust</td></tr> <tr><td>1</td><td>Trust Completely</td></tr> </table>                                                                                                                                       | 4 | Do not Trust at all | 3 | Slightly Trust | 2 | Somewhat Trust | 1 | Trust Completely  |   |                   |   |                   |    |                  |
| 4   | Do not Trust at all                                  |                                                                                                                                                                                                                                                                                              |                                                                                                                                                                                                                                                                                                                                                                         |   |                     |   |                |   |                |   |                   |   |                   |   |                   |    |                  |
| 3   | Slightly Trust                                       |                                                                                                                                                                                                                                                                                              |                                                                                                                                                                                                                                                                                                                                                                         |   |                     |   |                |   |                |   |                   |   |                   |   |                   |    |                  |
| 2   | Somewhat Trust                                       |                                                                                                                                                                                                                                                                                              |                                                                                                                                                                                                                                                                                                                                                                         |   |                     |   |                |   |                |   |                   |   |                   |   |                   |    |                  |
| 1   | Trust Completely                                     |                                                                                                                                                                                                                                                                                              |                                                                                                                                                                                                                                                                                                                                                                         |   |                     |   |                |   |                |   |                   |   |                   |   |                   |    |                  |
| 693 | cov23_pm2<br>Show the field ONLY if:<br>[cov3_pm2]=1 | How much do you trust information from the Georgia Department of Public Health about the new CoronaVirus?                                                                                                                                                                                    | radio, Required<br><table border="1"> <tr><td>4</td><td>Do not Trust at all</td></tr> <tr><td>3</td><td>Slightly Trust</td></tr> <tr><td>2</td><td>Somewhat Trust</td></tr> <tr><td>1</td><td>Trust Completely</td></tr> </table>                                                                                                                                       | 4 | Do not Trust at all | 3 | Slightly Trust | 2 | Somewhat Trust | 1 | Trust Completely  |   |                   |   |                   |    |                  |
| 4   | Do not Trust at all                                  |                                                                                                                                                                                                                                                                                              |                                                                                                                                                                                                                                                                                                                                                                         |   |                     |   |                |   |                |   |                   |   |                   |   |                   |    |                  |
| 3   | Slightly Trust                                       |                                                                                                                                                                                                                                                                                              |                                                                                                                                                                                                                                                                                                                                                                         |   |                     |   |                |   |                |   |                   |   |                   |   |                   |    |                  |
| 2   | Somewhat Trust                                       |                                                                                                                                                                                                                                                                                              |                                                                                                                                                                                                                                                                                                                                                                         |   |                     |   |                |   |                |   |                   |   |                   |   |                   |    |                  |
| 1   | Trust Completely                                     |                                                                                                                                                                                                                                                                                              |                                                                                                                                                                                                                                                                                                                                                                         |   |                     |   |                |   |                |   |                   |   |                   |   |                   |    |                  |
| 694 | cov24_pm2<br>Show the field ONLY if:<br>[cov3_pm2]=1 | How much do you trust information you are seeing online or in social media about the new CoronaVirus?                                                                                                                                                                                        | radio, Required<br><table border="1"> <tr><td>4</td><td>Do not Trust at all</td></tr> <tr><td>3</td><td>Slightly Trust</td></tr> <tr><td>2</td><td>Somewhat Trust</td></tr> <tr><td>1</td><td>Trust Completely</td></tr> </table>                                                                                                                                       | 4 | Do not Trust at all | 3 | Slightly Trust | 2 | Somewhat Trust | 1 | Trust Completely  |   |                   |   |                   |    |                  |
| 4   | Do not Trust at all                                  |                                                                                                                                                                                                                                                                                              |                                                                                                                                                                                                                                                                                                                                                                         |   |                     |   |                |   |                |   |                   |   |                   |   |                   |    |                  |
| 3   | Slightly Trust                                       |                                                                                                                                                                                                                                                                                              |                                                                                                                                                                                                                                                                                                                                                                         |   |                     |   |                |   |                |   |                   |   |                   |   |                   |    |                  |
| 2   | Somewhat Trust                                       |                                                                                                                                                                                                                                                                                              |                                                                                                                                                                                                                                                                                                                                                                         |   |                     |   |                |   |                |   |                   |   |                   |   |                   |    |                  |
| 1   | Trust Completely                                     |                                                                                                                                                                                                                                                                                              |                                                                                                                                                                                                                                                                                                                                                                         |   |                     |   |                |   |                |   |                   |   |                   |   |                   |    |                  |
| 695 | time5_pm2                                            | Section Header: <i>The following ask your opinion regarding the new CoronaVirus. How much do you agree or disagree with each statement? We are interested in your opinion. There are no right or wrong answers.</i><br>time                                                                  | text (datetime_seconds_mdy)<br>Field Annotation: @NOW @HIDDEN-SURVEY                                                                                                                                                                                                                                                                                                    |   |                     |   |                |   |                |   |                   |   |                   |   |                   |    |                  |
| 696 | cov25_pm2<br>Show the field ONLY if:<br>[cov3_pm2]=1 | It should be a crime for people who know they have the virus but do not take steps to prevent from spreading it.                                                                                                                                                                             | radio, Required<br><table border="1"> <tr><td>5</td><td>Strongly Agree</td></tr> <tr><td>4</td><td>Somewhat Agree</td></tr> <tr><td>3</td><td>Slightly Agree</td></tr> <tr><td>2</td><td>Slightly Disagree</td></tr> <tr><td>1</td><td>Somewhat Disagree</td></tr> <tr><td>0</td><td>Strongly Disagree</td></tr> <tr><td>10</td><td>Refuse to Answer</td></tr> </table> | 5 | Strongly Agree      | 4 | Somewhat Agree | 3 | Slightly Agree | 2 | Slightly Disagree | 1 | Somewhat Disagree | 0 | Strongly Disagree | 10 | Refuse to Answer |
| 5   | Strongly Agree                                       |                                                                                                                                                                                                                                                                                              |                                                                                                                                                                                                                                                                                                                                                                         |   |                     |   |                |   |                |   |                   |   |                   |   |                   |    |                  |
| 4   | Somewhat Agree                                       |                                                                                                                                                                                                                                                                                              |                                                                                                                                                                                                                                                                                                                                                                         |   |                     |   |                |   |                |   |                   |   |                   |   |                   |    |                  |
| 3   | Slightly Agree                                       |                                                                                                                                                                                                                                                                                              |                                                                                                                                                                                                                                                                                                                                                                         |   |                     |   |                |   |                |   |                   |   |                   |   |                   |    |                  |
| 2   | Slightly Disagree                                    |                                                                                                                                                                                                                                                                                              |                                                                                                                                                                                                                                                                                                                                                                         |   |                     |   |                |   |                |   |                   |   |                   |   |                   |    |                  |
| 1   | Somewhat Disagree                                    |                                                                                                                                                                                                                                                                                              |                                                                                                                                                                                                                                                                                                                                                                         |   |                     |   |                |   |                |   |                   |   |                   |   |                   |    |                  |
| 0   | Strongly Disagree                                    |                                                                                                                                                                                                                                                                                              |                                                                                                                                                                                                                                                                                                                                                                         |   |                     |   |                |   |                |   |                   |   |                   |   |                   |    |                  |
| 10  | Refuse to Answer                                     |                                                                                                                                                                                                                                                                                              |                                                                                                                                                                                                                                                                                                                                                                         |   |                     |   |                |   |                |   |                   |   |                   |   |                   |    |                  |

|     |                                                      |                                                                                                   |                                                                                                                                                                                                                                                                                                                                                                                                         |   |                |   |                |   |                |   |                   |   |                   |   |                   |    |                  |
|-----|------------------------------------------------------|---------------------------------------------------------------------------------------------------|---------------------------------------------------------------------------------------------------------------------------------------------------------------------------------------------------------------------------------------------------------------------------------------------------------------------------------------------------------------------------------------------------------|---|----------------|---|----------------|---|----------------|---|-------------------|---|-------------------|---|-------------------|----|------------------|
| 697 | cov26_pm2<br>Show the field ONLY if:<br>[cov3_pm2]=1 | People who test positive for the new virus should be required to wear identification tags.        | radio, Required<br><table border="1" data-bbox="1068 84 1383 457"> <tr><td>5</td><td>Strongly Agree</td></tr> <tr><td>4</td><td>Somewhat Agree</td></tr> <tr><td>3</td><td>Slightly Agree</td></tr> <tr><td>2</td><td>Slightly Disagree</td></tr> <tr><td>1</td><td>Somewhat Disagree</td></tr> <tr><td>0</td><td>Strongly Disagree</td></tr> <tr><td>10</td><td>Refuse to Answer</td></tr> </table>    | 5 | Strongly Agree | 4 | Somewhat Agree | 3 | Slightly Agree | 2 | Slightly Disagree | 1 | Somewhat Disagree | 0 | Strongly Disagree | 10 | Refuse to Answer |
| 5   | Strongly Agree                                       |                                                                                                   |                                                                                                                                                                                                                                                                                                                                                                                                         |   |                |   |                |   |                |   |                   |   |                   |   |                   |    |                  |
| 4   | Somewhat Agree                                       |                                                                                                   |                                                                                                                                                                                                                                                                                                                                                                                                         |   |                |   |                |   |                |   |                   |   |                   |   |                   |    |                  |
| 3   | Slightly Agree                                       |                                                                                                   |                                                                                                                                                                                                                                                                                                                                                                                                         |   |                |   |                |   |                |   |                   |   |                   |   |                   |    |                  |
| 2   | Slightly Disagree                                    |                                                                                                   |                                                                                                                                                                                                                                                                                                                                                                                                         |   |                |   |                |   |                |   |                   |   |                   |   |                   |    |                  |
| 1   | Somewhat Disagree                                    |                                                                                                   |                                                                                                                                                                                                                                                                                                                                                                                                         |   |                |   |                |   |                |   |                   |   |                   |   |                   |    |                  |
| 0   | Strongly Disagree                                    |                                                                                                   |                                                                                                                                                                                                                                                                                                                                                                                                         |   |                |   |                |   |                |   |                   |   |                   |   |                   |    |                  |
| 10  | Refuse to Answer                                     |                                                                                                   |                                                                                                                                                                                                                                                                                                                                                                                                         |   |                |   |                |   |                |   |                   |   |                   |   |                   |    |                  |
| 698 | cov27_pm2<br>Show the field ONLY if:<br>[cov3_pm2]=1 | I am afraid of the new virus.                                                                     | radio, Required<br><table border="1" data-bbox="1068 512 1383 886"> <tr><td>5</td><td>Strongly Agree</td></tr> <tr><td>4</td><td>Somewhat Agree</td></tr> <tr><td>3</td><td>Slightly Agree</td></tr> <tr><td>2</td><td>Slightly Disagree</td></tr> <tr><td>1</td><td>Somewhat Disagree</td></tr> <tr><td>0</td><td>Strongly Disagree</td></tr> <tr><td>10</td><td>Refuse to Answer</td></tr> </table>   | 5 | Strongly Agree | 4 | Somewhat Agree | 3 | Slightly Agree | 2 | Slightly Disagree | 1 | Somewhat Disagree | 0 | Strongly Disagree | 10 | Refuse to Answer |
| 5   | Strongly Agree                                       |                                                                                                   |                                                                                                                                                                                                                                                                                                                                                                                                         |   |                |   |                |   |                |   |                   |   |                   |   |                   |    |                  |
| 4   | Somewhat Agree                                       |                                                                                                   |                                                                                                                                                                                                                                                                                                                                                                                                         |   |                |   |                |   |                |   |                   |   |                   |   |                   |    |                  |
| 3   | Slightly Agree                                       |                                                                                                   |                                                                                                                                                                                                                                                                                                                                                                                                         |   |                |   |                |   |                |   |                   |   |                   |   |                   |    |                  |
| 2   | Slightly Disagree                                    |                                                                                                   |                                                                                                                                                                                                                                                                                                                                                                                                         |   |                |   |                |   |                |   |                   |   |                   |   |                   |    |                  |
| 1   | Somewhat Disagree                                    |                                                                                                   |                                                                                                                                                                                                                                                                                                                                                                                                         |   |                |   |                |   |                |   |                   |   |                   |   |                   |    |                  |
| 0   | Strongly Disagree                                    |                                                                                                   |                                                                                                                                                                                                                                                                                                                                                                                                         |   |                |   |                |   |                |   |                   |   |                   |   |                   |    |                  |
| 10  | Refuse to Answer                                     |                                                                                                   |                                                                                                                                                                                                                                                                                                                                                                                                         |   |                |   |                |   |                |   |                   |   |                   |   |                   |    |                  |
| 699 | cov28_pm2<br>Show the field ONLY if:<br>[cov3_pm2]=1 | People who test positive for CoronaVirus should be quarantined or separated by force from others. | radio, Required<br><table border="1" data-bbox="1068 945 1383 1318"> <tr><td>5</td><td>Strongly Agree</td></tr> <tr><td>4</td><td>Somewhat Agree</td></tr> <tr><td>3</td><td>Slightly Agree</td></tr> <tr><td>2</td><td>Slightly Disagree</td></tr> <tr><td>1</td><td>Somewhat Disagree</td></tr> <tr><td>0</td><td>Strongly Disagree</td></tr> <tr><td>10</td><td>Refuse to Answer</td></tr> </table>  | 5 | Strongly Agree | 4 | Somewhat Agree | 3 | Slightly Agree | 2 | Slightly Disagree | 1 | Somewhat Disagree | 0 | Strongly Disagree | 10 | Refuse to Answer |
| 5   | Strongly Agree                                       |                                                                                                   |                                                                                                                                                                                                                                                                                                                                                                                                         |   |                |   |                |   |                |   |                   |   |                   |   |                   |    |                  |
| 4   | Somewhat Agree                                       |                                                                                                   |                                                                                                                                                                                                                                                                                                                                                                                                         |   |                |   |                |   |                |   |                   |   |                   |   |                   |    |                  |
| 3   | Slightly Agree                                       |                                                                                                   |                                                                                                                                                                                                                                                                                                                                                                                                         |   |                |   |                |   |                |   |                   |   |                   |   |                   |    |                  |
| 2   | Slightly Disagree                                    |                                                                                                   |                                                                                                                                                                                                                                                                                                                                                                                                         |   |                |   |                |   |                |   |                   |   |                   |   |                   |    |                  |
| 1   | Somewhat Disagree                                    |                                                                                                   |                                                                                                                                                                                                                                                                                                                                                                                                         |   |                |   |                |   |                |   |                   |   |                   |   |                   |    |                  |
| 0   | Strongly Disagree                                    |                                                                                                   |                                                                                                                                                                                                                                                                                                                                                                                                         |   |                |   |                |   |                |   |                   |   |                   |   |                   |    |                  |
| 10  | Refuse to Answer                                     |                                                                                                   |                                                                                                                                                                                                                                                                                                                                                                                                         |   |                |   |                |   |                |   |                   |   |                   |   |                   |    |                  |
| 700 | cov29_pm2<br>Show the field ONLY if:<br>[cov3_pm2]=1 | If I tested positive for the CoronaVirus people would treat me differently.                       | radio, Required<br><table border="1" data-bbox="1068 1377 1383 1751"> <tr><td>5</td><td>Strongly Agree</td></tr> <tr><td>4</td><td>Somewhat Agree</td></tr> <tr><td>3</td><td>Slightly Agree</td></tr> <tr><td>2</td><td>Slightly Disagree</td></tr> <tr><td>1</td><td>Somewhat Disagree</td></tr> <tr><td>0</td><td>Strongly Disagree</td></tr> <tr><td>10</td><td>Refuse to Answer</td></tr> </table> | 5 | Strongly Agree | 4 | Somewhat Agree | 3 | Slightly Agree | 2 | Slightly Disagree | 1 | Somewhat Disagree | 0 | Strongly Disagree | 10 | Refuse to Answer |
| 5   | Strongly Agree                                       |                                                                                                   |                                                                                                                                                                                                                                                                                                                                                                                                         |   |                |   |                |   |                |   |                   |   |                   |   |                   |    |                  |
| 4   | Somewhat Agree                                       |                                                                                                   |                                                                                                                                                                                                                                                                                                                                                                                                         |   |                |   |                |   |                |   |                   |   |                   |   |                   |    |                  |
| 3   | Slightly Agree                                       |                                                                                                   |                                                                                                                                                                                                                                                                                                                                                                                                         |   |                |   |                |   |                |   |                   |   |                   |   |                   |    |                  |
| 2   | Slightly Disagree                                    |                                                                                                   |                                                                                                                                                                                                                                                                                                                                                                                                         |   |                |   |                |   |                |   |                   |   |                   |   |                   |    |                  |
| 1   | Somewhat Disagree                                    |                                                                                                   |                                                                                                                                                                                                                                                                                                                                                                                                         |   |                |   |                |   |                |   |                   |   |                   |   |                   |    |                  |
| 0   | Strongly Disagree                                    |                                                                                                   |                                                                                                                                                                                                                                                                                                                                                                                                         |   |                |   |                |   |                |   |                   |   |                   |   |                   |    |                  |
| 10  | Refuse to Answer                                     |                                                                                                   |                                                                                                                                                                                                                                                                                                                                                                                                         |   |                |   |                |   |                |   |                   |   |                   |   |                   |    |                  |

|     |                                                      |                                                                                                           |                                                                                                                                                                                                                                                                                                                                                                                                         |   |                |   |                |   |                |   |                   |   |                   |   |                   |    |                  |
|-----|------------------------------------------------------|-----------------------------------------------------------------------------------------------------------|---------------------------------------------------------------------------------------------------------------------------------------------------------------------------------------------------------------------------------------------------------------------------------------------------------------------------------------------------------------------------------------------------------|---|----------------|---|----------------|---|----------------|---|-------------------|---|-------------------|---|-------------------|----|------------------|
| 701 | cov30_pm2<br>Show the field ONLY if:<br>[cov3_pm2]=1 | If I tested positive for the CoronaVirus I would not tell anyone.                                         | radio, Required<br><table border="1" data-bbox="1068 79 1385 457"> <tr><td>5</td><td>Strongly Agree</td></tr> <tr><td>4</td><td>Somewhat Agree</td></tr> <tr><td>3</td><td>Slightly Agree</td></tr> <tr><td>2</td><td>Slightly Disagree</td></tr> <tr><td>1</td><td>Somewhat Disagree</td></tr> <tr><td>0</td><td>Strongly Disagree</td></tr> <tr><td>10</td><td>Refuse to Answer</td></tr> </table>    | 5 | Strongly Agree | 4 | Somewhat Agree | 3 | Slightly Agree | 2 | Slightly Disagree | 1 | Somewhat Disagree | 0 | Strongly Disagree | 10 | Refuse to Answer |
| 5   | Strongly Agree                                       |                                                                                                           |                                                                                                                                                                                                                                                                                                                                                                                                         |   |                |   |                |   |                |   |                   |   |                   |   |                   |    |                  |
| 4   | Somewhat Agree                                       |                                                                                                           |                                                                                                                                                                                                                                                                                                                                                                                                         |   |                |   |                |   |                |   |                   |   |                   |   |                   |    |                  |
| 3   | Slightly Agree                                       |                                                                                                           |                                                                                                                                                                                                                                                                                                                                                                                                         |   |                |   |                |   |                |   |                   |   |                   |   |                   |    |                  |
| 2   | Slightly Disagree                                    |                                                                                                           |                                                                                                                                                                                                                                                                                                                                                                                                         |   |                |   |                |   |                |   |                   |   |                   |   |                   |    |                  |
| 1   | Somewhat Disagree                                    |                                                                                                           |                                                                                                                                                                                                                                                                                                                                                                                                         |   |                |   |                |   |                |   |                   |   |                   |   |                   |    |                  |
| 0   | Strongly Disagree                                    |                                                                                                           |                                                                                                                                                                                                                                                                                                                                                                                                         |   |                |   |                |   |                |   |                   |   |                   |   |                   |    |                  |
| 10  | Refuse to Answer                                     |                                                                                                           |                                                                                                                                                                                                                                                                                                                                                                                                         |   |                |   |                |   |                |   |                   |   |                   |   |                   |    |                  |
| 702 | cov31_pm2<br>Show the field ONLY if:<br>[cov3_pm2]=1 | People who have been to China in the past year should not be allowed into the United States.              | radio, Required<br><table border="1" data-bbox="1068 508 1385 886"> <tr><td>5</td><td>Strongly Agree</td></tr> <tr><td>4</td><td>Somewhat Agree</td></tr> <tr><td>3</td><td>Slightly Agree</td></tr> <tr><td>2</td><td>Slightly Disagree</td></tr> <tr><td>1</td><td>Somewhat Disagree</td></tr> <tr><td>0</td><td>Strongly Disagree</td></tr> <tr><td>10</td><td>Refuse to Answer</td></tr> </table>   | 5 | Strongly Agree | 4 | Somewhat Agree | 3 | Slightly Agree | 2 | Slightly Disagree | 1 | Somewhat Disagree | 0 | Strongly Disagree | 10 | Refuse to Answer |
| 5   | Strongly Agree                                       |                                                                                                           |                                                                                                                                                                                                                                                                                                                                                                                                         |   |                |   |                |   |                |   |                   |   |                   |   |                   |    |                  |
| 4   | Somewhat Agree                                       |                                                                                                           |                                                                                                                                                                                                                                                                                                                                                                                                         |   |                |   |                |   |                |   |                   |   |                   |   |                   |    |                  |
| 3   | Slightly Agree                                       |                                                                                                           |                                                                                                                                                                                                                                                                                                                                                                                                         |   |                |   |                |   |                |   |                   |   |                   |   |                   |    |                  |
| 2   | Slightly Disagree                                    |                                                                                                           |                                                                                                                                                                                                                                                                                                                                                                                                         |   |                |   |                |   |                |   |                   |   |                   |   |                   |    |                  |
| 1   | Somewhat Disagree                                    |                                                                                                           |                                                                                                                                                                                                                                                                                                                                                                                                         |   |                |   |                |   |                |   |                   |   |                   |   |                   |    |                  |
| 0   | Strongly Disagree                                    |                                                                                                           |                                                                                                                                                                                                                                                                                                                                                                                                         |   |                |   |                |   |                |   |                   |   |                   |   |                   |    |                  |
| 10  | Refuse to Answer                                     |                                                                                                           |                                                                                                                                                                                                                                                                                                                                                                                                         |   |                |   |                |   |                |   |                   |   |                   |   |                   |    |                  |
| 703 | cov32_pm2<br>Show the field ONLY if:<br>[cov3_pm2]=1 | I am afraid of people who have this new virus.                                                            | radio, Required<br><table border="1" data-bbox="1068 940 1385 1318"> <tr><td>5</td><td>Strongly Agree</td></tr> <tr><td>4</td><td>Somewhat Agree</td></tr> <tr><td>3</td><td>Slightly Agree</td></tr> <tr><td>2</td><td>Slightly Disagree</td></tr> <tr><td>1</td><td>Somewhat Disagree</td></tr> <tr><td>0</td><td>Strongly Disagree</td></tr> <tr><td>10</td><td>Refuse to Answer</td></tr> </table>  | 5 | Strongly Agree | 4 | Somewhat Agree | 3 | Slightly Agree | 2 | Slightly Disagree | 1 | Somewhat Disagree | 0 | Strongly Disagree | 10 | Refuse to Answer |
| 5   | Strongly Agree                                       |                                                                                                           |                                                                                                                                                                                                                                                                                                                                                                                                         |   |                |   |                |   |                |   |                   |   |                   |   |                   |    |                  |
| 4   | Somewhat Agree                                       |                                                                                                           |                                                                                                                                                                                                                                                                                                                                                                                                         |   |                |   |                |   |                |   |                   |   |                   |   |                   |    |                  |
| 3   | Slightly Agree                                       |                                                                                                           |                                                                                                                                                                                                                                                                                                                                                                                                         |   |                |   |                |   |                |   |                   |   |                   |   |                   |    |                  |
| 2   | Slightly Disagree                                    |                                                                                                           |                                                                                                                                                                                                                                                                                                                                                                                                         |   |                |   |                |   |                |   |                   |   |                   |   |                   |    |                  |
| 1   | Somewhat Disagree                                    |                                                                                                           |                                                                                                                                                                                                                                                                                                                                                                                                         |   |                |   |                |   |                |   |                   |   |                   |   |                   |    |                  |
| 0   | Strongly Disagree                                    |                                                                                                           |                                                                                                                                                                                                                                                                                                                                                                                                         |   |                |   |                |   |                |   |                   |   |                   |   |                   |    |                  |
| 10  | Refuse to Answer                                     |                                                                                                           |                                                                                                                                                                                                                                                                                                                                                                                                         |   |                |   |                |   |                |   |                   |   |                   |   |                   |    |                  |
| 704 | cov33_pm2<br>Show the field ONLY if:<br>[cov3_pm2]=1 | Areas in the city that are heavily populated by people from China should be closed off, or 'locked down'. | radio, Required<br><table border="1" data-bbox="1068 1373 1385 1751"> <tr><td>5</td><td>Strongly Agree</td></tr> <tr><td>4</td><td>Somewhat Agree</td></tr> <tr><td>3</td><td>Slightly Agree</td></tr> <tr><td>2</td><td>Slightly Disagree</td></tr> <tr><td>1</td><td>Somewhat Disagree</td></tr> <tr><td>0</td><td>Strongly Disagree</td></tr> <tr><td>10</td><td>Refuse to Answer</td></tr> </table> | 5 | Strongly Agree | 4 | Somewhat Agree | 3 | Slightly Agree | 2 | Slightly Disagree | 1 | Somewhat Disagree | 0 | Strongly Disagree | 10 | Refuse to Answer |
| 5   | Strongly Agree                                       |                                                                                                           |                                                                                                                                                                                                                                                                                                                                                                                                         |   |                |   |                |   |                |   |                   |   |                   |   |                   |    |                  |
| 4   | Somewhat Agree                                       |                                                                                                           |                                                                                                                                                                                                                                                                                                                                                                                                         |   |                |   |                |   |                |   |                   |   |                   |   |                   |    |                  |
| 3   | Slightly Agree                                       |                                                                                                           |                                                                                                                                                                                                                                                                                                                                                                                                         |   |                |   |                |   |                |   |                   |   |                   |   |                   |    |                  |
| 2   | Slightly Disagree                                    |                                                                                                           |                                                                                                                                                                                                                                                                                                                                                                                                         |   |                |   |                |   |                |   |                   |   |                   |   |                   |    |                  |
| 1   | Somewhat Disagree                                    |                                                                                                           |                                                                                                                                                                                                                                                                                                                                                                                                         |   |                |   |                |   |                |   |                   |   |                   |   |                   |    |                  |
| 0   | Strongly Disagree                                    |                                                                                                           |                                                                                                                                                                                                                                                                                                                                                                                                         |   |                |   |                |   |                |   |                   |   |                   |   |                   |    |                  |
| 10  | Refuse to Answer                                     |                                                                                                           |                                                                                                                                                                                                                                                                                                                                                                                                         |   |                |   |                |   |                |   |                   |   |                   |   |                   |    |                  |

|     |                                                      |                                                                                                                                                    |                                                                                                                                                                                                                                                                                                                                                                                                         |   |                |   |                |   |                |   |                   |   |                   |   |                   |    |                  |
|-----|------------------------------------------------------|----------------------------------------------------------------------------------------------------------------------------------------------------|---------------------------------------------------------------------------------------------------------------------------------------------------------------------------------------------------------------------------------------------------------------------------------------------------------------------------------------------------------------------------------------------------------|---|----------------|---|----------------|---|----------------|---|-------------------|---|-------------------|---|-------------------|----|------------------|
| 705 | cov34_pm2<br>Show the field ONLY if:<br>[cov3_pm2]=1 | People who have been to China should be forced to be tested for this new virus.                                                                    | radio, Required<br><table border="1" data-bbox="1068 84 1383 457"> <tr><td>5</td><td>Strongly Agree</td></tr> <tr><td>4</td><td>Somewhat Agree</td></tr> <tr><td>3</td><td>Slightly Agree</td></tr> <tr><td>2</td><td>Slightly Disagree</td></tr> <tr><td>1</td><td>Somewhat Disagree</td></tr> <tr><td>0</td><td>Strongly Disagree</td></tr> <tr><td>10</td><td>Refuse to Answer</td></tr> </table>    | 5 | Strongly Agree | 4 | Somewhat Agree | 3 | Slightly Agree | 2 | Slightly Disagree | 1 | Somewhat Disagree | 0 | Strongly Disagree | 10 | Refuse to Answer |
| 5   | Strongly Agree                                       |                                                                                                                                                    |                                                                                                                                                                                                                                                                                                                                                                                                         |   |                |   |                |   |                |   |                   |   |                   |   |                   |    |                  |
| 4   | Somewhat Agree                                       |                                                                                                                                                    |                                                                                                                                                                                                                                                                                                                                                                                                         |   |                |   |                |   |                |   |                   |   |                   |   |                   |    |                  |
| 3   | Slightly Agree                                       |                                                                                                                                                    |                                                                                                                                                                                                                                                                                                                                                                                                         |   |                |   |                |   |                |   |                   |   |                   |   |                   |    |                  |
| 2   | Slightly Disagree                                    |                                                                                                                                                    |                                                                                                                                                                                                                                                                                                                                                                                                         |   |                |   |                |   |                |   |                   |   |                   |   |                   |    |                  |
| 1   | Somewhat Disagree                                    |                                                                                                                                                    |                                                                                                                                                                                                                                                                                                                                                                                                         |   |                |   |                |   |                |   |                   |   |                   |   |                   |    |                  |
| 0   | Strongly Disagree                                    |                                                                                                                                                    |                                                                                                                                                                                                                                                                                                                                                                                                         |   |                |   |                |   |                |   |                   |   |                   |   |                   |    |                  |
| 10  | Refuse to Answer                                     |                                                                                                                                                    |                                                                                                                                                                                                                                                                                                                                                                                                         |   |                |   |                |   |                |   |                   |   |                   |   |                   |    |                  |
| 706 | cov35_pm2<br>Show the field ONLY if:<br>[cov3_pm2]=1 | People from countries with more of the new virus should not be allowed in the US.                                                                  | radio, Required<br><table border="1" data-bbox="1068 512 1383 886"> <tr><td>5</td><td>Strongly Agree</td></tr> <tr><td>4</td><td>Somewhat Agree</td></tr> <tr><td>3</td><td>Slightly Agree</td></tr> <tr><td>2</td><td>Slightly Disagree</td></tr> <tr><td>1</td><td>Somewhat Disagree</td></tr> <tr><td>0</td><td>Strongly Disagree</td></tr> <tr><td>10</td><td>Refuse to Answer</td></tr> </table>   | 5 | Strongly Agree | 4 | Somewhat Agree | 3 | Slightly Agree | 2 | Slightly Disagree | 1 | Somewhat Disagree | 0 | Strongly Disagree | 10 | Refuse to Answer |
| 5   | Strongly Agree                                       |                                                                                                                                                    |                                                                                                                                                                                                                                                                                                                                                                                                         |   |                |   |                |   |                |   |                   |   |                   |   |                   |    |                  |
| 4   | Somewhat Agree                                       |                                                                                                                                                    |                                                                                                                                                                                                                                                                                                                                                                                                         |   |                |   |                |   |                |   |                   |   |                   |   |                   |    |                  |
| 3   | Slightly Agree                                       |                                                                                                                                                    |                                                                                                                                                                                                                                                                                                                                                                                                         |   |                |   |                |   |                |   |                   |   |                   |   |                   |    |                  |
| 2   | Slightly Disagree                                    |                                                                                                                                                    |                                                                                                                                                                                                                                                                                                                                                                                                         |   |                |   |                |   |                |   |                   |   |                   |   |                   |    |                  |
| 1   | Somewhat Disagree                                    |                                                                                                                                                    |                                                                                                                                                                                                                                                                                                                                                                                                         |   |                |   |                |   |                |   |                   |   |                   |   |                   |    |                  |
| 0   | Strongly Disagree                                    |                                                                                                                                                    |                                                                                                                                                                                                                                                                                                                                                                                                         |   |                |   |                |   |                |   |                   |   |                   |   |                   |    |                  |
| 10  | Refuse to Answer                                     |                                                                                                                                                    |                                                                                                                                                                                                                                                                                                                                                                                                         |   |                |   |                |   |                |   |                   |   |                   |   |                   |    |                  |
| 707 | cov36_pm2<br>Show the field ONLY if:<br>[cov3_pm2]=1 | People who have been to New York should be forced to be tested for this new virus.                                                                 | radio, Required<br><table border="1" data-bbox="1068 945 1383 1318"> <tr><td>5</td><td>Strongly Agree</td></tr> <tr><td>4</td><td>Somewhat Agree</td></tr> <tr><td>3</td><td>Slightly Agree</td></tr> <tr><td>2</td><td>Slightly Disagree</td></tr> <tr><td>1</td><td>Somewhat Disagree</td></tr> <tr><td>0</td><td>Strongly Disagree</td></tr> <tr><td>10</td><td>Refuse to Answer</td></tr> </table>  | 5 | Strongly Agree | 4 | Somewhat Agree | 3 | Slightly Agree | 2 | Slightly Disagree | 1 | Somewhat Disagree | 0 | Strongly Disagree | 10 | Refuse to Answer |
| 5   | Strongly Agree                                       |                                                                                                                                                    |                                                                                                                                                                                                                                                                                                                                                                                                         |   |                |   |                |   |                |   |                   |   |                   |   |                   |    |                  |
| 4   | Somewhat Agree                                       |                                                                                                                                                    |                                                                                                                                                                                                                                                                                                                                                                                                         |   |                |   |                |   |                |   |                   |   |                   |   |                   |    |                  |
| 3   | Slightly Agree                                       |                                                                                                                                                    |                                                                                                                                                                                                                                                                                                                                                                                                         |   |                |   |                |   |                |   |                   |   |                   |   |                   |    |                  |
| 2   | Slightly Disagree                                    |                                                                                                                                                    |                                                                                                                                                                                                                                                                                                                                                                                                         |   |                |   |                |   |                |   |                   |   |                   |   |                   |    |                  |
| 1   | Somewhat Disagree                                    |                                                                                                                                                    |                                                                                                                                                                                                                                                                                                                                                                                                         |   |                |   |                |   |                |   |                   |   |                   |   |                   |    |                  |
| 0   | Strongly Disagree                                    |                                                                                                                                                    |                                                                                                                                                                                                                                                                                                                                                                                                         |   |                |   |                |   |                |   |                   |   |                   |   |                   |    |                  |
| 10  | Refuse to Answer                                     |                                                                                                                                                    |                                                                                                                                                                                                                                                                                                                                                                                                         |   |                |   |                |   |                |   |                   |   |                   |   |                   |    |                  |
| 708 | cov37_pm2<br>Show the field ONLY if:<br>[cov3_pm2]=1 | People from states with more of the new virus should not be allowed in the Georgia.                                                                | radio, Required<br><table border="1" data-bbox="1068 1377 1383 1751"> <tr><td>5</td><td>Strongly Agree</td></tr> <tr><td>4</td><td>Somewhat Agree</td></tr> <tr><td>3</td><td>Slightly Agree</td></tr> <tr><td>2</td><td>Slightly Disagree</td></tr> <tr><td>1</td><td>Somewhat Disagree</td></tr> <tr><td>0</td><td>Strongly Disagree</td></tr> <tr><td>10</td><td>Refuse to Answer</td></tr> </table> | 5 | Strongly Agree | 4 | Somewhat Agree | 3 | Slightly Agree | 2 | Slightly Disagree | 1 | Somewhat Disagree | 0 | Strongly Disagree | 10 | Refuse to Answer |
| 5   | Strongly Agree                                       |                                                                                                                                                    |                                                                                                                                                                                                                                                                                                                                                                                                         |   |                |   |                |   |                |   |                   |   |                   |   |                   |    |                  |
| 4   | Somewhat Agree                                       |                                                                                                                                                    |                                                                                                                                                                                                                                                                                                                                                                                                         |   |                |   |                |   |                |   |                   |   |                   |   |                   |    |                  |
| 3   | Slightly Agree                                       |                                                                                                                                                    |                                                                                                                                                                                                                                                                                                                                                                                                         |   |                |   |                |   |                |   |                   |   |                   |   |                   |    |                  |
| 2   | Slightly Disagree                                    |                                                                                                                                                    |                                                                                                                                                                                                                                                                                                                                                                                                         |   |                |   |                |   |                |   |                   |   |                   |   |                   |    |                  |
| 1   | Somewhat Disagree                                    |                                                                                                                                                    |                                                                                                                                                                                                                                                                                                                                                                                                         |   |                |   |                |   |                |   |                   |   |                   |   |                   |    |                  |
| 0   | Strongly Disagree                                    |                                                                                                                                                    |                                                                                                                                                                                                                                                                                                                                                                                                         |   |                |   |                |   |                |   |                   |   |                   |   |                   |    |                  |
| 10  | Refuse to Answer                                     |                                                                                                                                                    |                                                                                                                                                                                                                                                                                                                                                                                                         |   |                |   |                |   |                |   |                   |   |                   |   |                   |    |                  |
| 709 | time6_pm2                                            | Section Header: <i>It's common for people to use alcohol and other drugs. Think about yourself when answering the following questions.</i><br>time | text (datetime_seconds_mdy)<br>Field Annotation: @NOW @HIDDEN-SURVEY                                                                                                                                                                                                                                                                                                                                    |   |                |   |                |   |                |   |                   |   |                   |   |                   |    |                  |

|     |                                                                                                                               |                                                                                        |                                                                                                                                                                                                                                                                                                              |   |        |   |                   |    |                   |   |                  |   |                          |
|-----|-------------------------------------------------------------------------------------------------------------------------------|----------------------------------------------------------------------------------------|--------------------------------------------------------------------------------------------------------------------------------------------------------------------------------------------------------------------------------------------------------------------------------------------------------------|---|--------|---|-------------------|----|-------------------|---|------------------|---|--------------------------|
| 710 | audit1_pm2                                                                                                                    | How often do you have a drink containing alcohol?                                      | radio, Required<br><table border="1" data-bbox="1068 81 1442 348"> <tr><td>0</td><td>Never</td></tr> <tr><td>1</td><td>Monthly or less</td></tr> <tr><td>2</td><td>2-4 times a month</td></tr> <tr><td>3</td><td>2-3 times a week</td></tr> <tr><td>4</td><td>More than 4 times a week</td></tr> </table>    | 0 | Never  | 1 | Monthly or less   | 2  | 2-4 times a month | 3 | 2-3 times a week | 4 | More than 4 times a week |
| 0   | Never                                                                                                                         |                                                                                        |                                                                                                                                                                                                                                                                                                              |   |        |   |                   |    |                   |   |                  |   |                          |
| 1   | Monthly or less                                                                                                               |                                                                                        |                                                                                                                                                                                                                                                                                                              |   |        |   |                   |    |                   |   |                  |   |                          |
| 2   | 2-4 times a month                                                                                                             |                                                                                        |                                                                                                                                                                                                                                                                                                              |   |        |   |                   |    |                   |   |                  |   |                          |
| 3   | 2-3 times a week                                                                                                              |                                                                                        |                                                                                                                                                                                                                                                                                                              |   |        |   |                   |    |                   |   |                  |   |                          |
| 4   | More than 4 times a week                                                                                                      |                                                                                        |                                                                                                                                                                                                                                                                                                              |   |        |   |                   |    |                   |   |                  |   |                          |
| 711 | audit2_pm2<br>Show the field ONLY if:<br>[audit1_pm2] = '1' or [audit1_pm2] = '2' or [audit1_pm2] = '3' or [audit1_pm2] = '4' | How many drinks containing alcohol do you have on a typical day when you are drinking? | radio, Required<br><table border="1" data-bbox="1068 405 1265 672"> <tr><td>0</td><td>1 or 2</td></tr> <tr><td>1</td><td>3 or 4</td></tr> <tr><td>2</td><td>5 or 6</td></tr> <tr><td>3</td><td>7 to 9</td></tr> <tr><td>4</td><td>10 or more</td></tr> </table>                                              | 0 | 1 or 2 | 1 | 3 or 4            | 2  | 5 or 6            | 3 | 7 to 9           | 4 | 10 or more               |
| 0   | 1 or 2                                                                                                                        |                                                                                        |                                                                                                                                                                                                                                                                                                              |   |        |   |                   |    |                   |   |                  |   |                          |
| 1   | 3 or 4                                                                                                                        |                                                                                        |                                                                                                                                                                                                                                                                                                              |   |        |   |                   |    |                   |   |                  |   |                          |
| 2   | 5 or 6                                                                                                                        |                                                                                        |                                                                                                                                                                                                                                                                                                              |   |        |   |                   |    |                   |   |                  |   |                          |
| 3   | 7 to 9                                                                                                                        |                                                                                        |                                                                                                                                                                                                                                                                                                              |   |        |   |                   |    |                   |   |                  |   |                          |
| 4   | 10 or more                                                                                                                    |                                                                                        |                                                                                                                                                                                                                                                                                                              |   |        |   |                   |    |                   |   |                  |   |                          |
| 712 | audit3_pm2<br>Show the field ONLY if:<br>[audit1_pm2] = '1' or [audit1_pm2] = '2' or [audit1_pm2] = '3' or [audit1_pm2] = '4' | How often do you have six or more drinks on one occasion?                              | radio, Required<br><table border="1" data-bbox="1068 730 1373 997"> <tr><td>0</td><td>Never</td></tr> <tr><td>1</td><td>Less than monthly</td></tr> <tr><td>2</td><td>Monthly</td></tr> <tr><td>3</td><td>Weekly</td></tr> <tr><td>4</td><td>Daily or almost daily</td></tr> </table>                        | 0 | Never  | 1 | Less than monthly | 2  | Monthly           | 3 | Weekly           | 4 | Daily or almost daily    |
| 0   | Never                                                                                                                         |                                                                                        |                                                                                                                                                                                                                                                                                                              |   |        |   |                   |    |                   |   |                  |   |                          |
| 1   | Less than monthly                                                                                                             |                                                                                        |                                                                                                                                                                                                                                                                                                              |   |        |   |                   |    |                   |   |                  |   |                          |
| 2   | Monthly                                                                                                                       |                                                                                        |                                                                                                                                                                                                                                                                                                              |   |        |   |                   |    |                   |   |                  |   |                          |
| 3   | Weekly                                                                                                                        |                                                                                        |                                                                                                                                                                                                                                                                                                              |   |        |   |                   |    |                   |   |                  |   |                          |
| 4   | Daily or almost daily                                                                                                         |                                                                                        |                                                                                                                                                                                                                                                                                                              |   |        |   |                   |    |                   |   |                  |   |                          |
| 713 | audit1a_pm2                                                                                                                   | Did you stop drinking when you tested positive for HIV?                                | radio, Required<br><table border="1" data-bbox="1068 1056 1352 1213"> <tr><td>1</td><td>Yes</td></tr> <tr><td>0</td><td>No</td></tr> <tr><td>10</td><td>Refuse to answer</td></tr> </table>                                                                                                                  | 1 | Yes    | 0 | No                | 10 | Refuse to answer  |   |                  |   |                          |
| 1   | Yes                                                                                                                           |                                                                                        |                                                                                                                                                                                                                                                                                                              |   |        |   |                   |    |                   |   |                  |   |                          |
| 0   | No                                                                                                                            |                                                                                        |                                                                                                                                                                                                                                                                                                              |   |        |   |                   |    |                   |   |                  |   |                          |
| 10  | Refuse to answer                                                                                                              |                                                                                        |                                                                                                                                                                                                                                                                                                              |   |        |   |                   |    |                   |   |                  |   |                          |
| 714 | audit1b_pm2                                                                                                                   | Did you stop drinking when you started taking HIV medications?                         | radio, Required<br><table border="1" data-bbox="1068 1272 1352 1430"> <tr><td>1</td><td>Yes</td></tr> <tr><td>0</td><td>No</td></tr> <tr><td>10</td><td>Refuse to answer</td></tr> </table>                                                                                                                  | 1 | Yes    | 0 | No                | 10 | Refuse to answer  |   |                  |   |                          |
| 1   | Yes                                                                                                                           |                                                                                        |                                                                                                                                                                                                                                                                                                              |   |        |   |                   |    |                   |   |                  |   |                          |
| 0   | No                                                                                                                            |                                                                                        |                                                                                                                                                                                                                                                                                                              |   |        |   |                   |    |                   |   |                  |   |                          |
| 10  | Refuse to answer                                                                                                              |                                                                                        |                                                                                                                                                                                                                                                                                                              |   |        |   |                   |    |                   |   |                  |   |                          |
| 715 | drugs1_pm2                                                                                                                    | How often do you use marijuana (pot, grass etc.)?                                      | radio, Required<br><table border="1" data-bbox="1068 1488 1442 1755"> <tr><td>0</td><td>Never</td></tr> <tr><td>1</td><td>Monthly or less</td></tr> <tr><td>2</td><td>2-4 times a month</td></tr> <tr><td>3</td><td>2-3 times a week</td></tr> <tr><td>4</td><td>More than 4 times a week</td></tr> </table> | 0 | Never  | 1 | Monthly or less   | 2  | 2-4 times a month | 3 | 2-3 times a week | 4 | More than 4 times a week |
| 0   | Never                                                                                                                         |                                                                                        |                                                                                                                                                                                                                                                                                                              |   |        |   |                   |    |                   |   |                  |   |                          |
| 1   | Monthly or less                                                                                                               |                                                                                        |                                                                                                                                                                                                                                                                                                              |   |        |   |                   |    |                   |   |                  |   |                          |
| 2   | 2-4 times a month                                                                                                             |                                                                                        |                                                                                                                                                                                                                                                                                                              |   |        |   |                   |    |                   |   |                  |   |                          |
| 3   | 2-3 times a week                                                                                                              |                                                                                        |                                                                                                                                                                                                                                                                                                              |   |        |   |                   |    |                   |   |                  |   |                          |
| 4   | More than 4 times a week                                                                                                      |                                                                                        |                                                                                                                                                                                                                                                                                                              |   |        |   |                   |    |                   |   |                  |   |                          |
